# Supplementary material
Source: publisher figshare collection journal article supplement (https://asha.figshare.com/ndownloader/files/34148427)

**Supplemental Figure S5.** Number of participants with auditory processing scores two *SDs* outside the mean for each assessment.

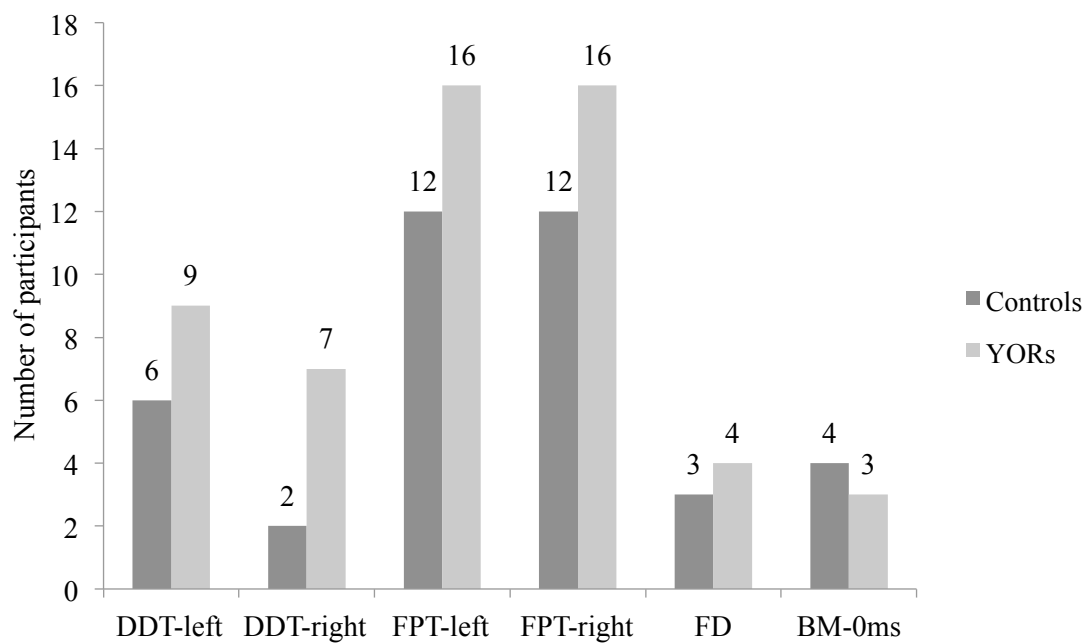

Supplement: Supplementary file 1 [file 34148427]
